# Supplementary material for: Towards a patient journey perspective on causes of unplanned readmissions using a classification framework: results of a systematic review with narrative synthesis
Source: BMC Med Res Methodol. 2019 Oct 4;19:189. doi: 10.1186/s12874-019-0822-9 (PMC6778387; doi:10.1186/s12874-019-0822-9)
Supplement: Supplementary file 5 — Root cause and causes as reported in articles. (XLSX 29 kb) [file 12874_2019_822_MOESM5_ESM.xlsx]

## Sheet: Blad1
Root cause	Causes as reported in articles (n=381)	Author	Preventability
Organization – integrated care (n=31; 8.1%)	coordination care among team members - Team did not relay important information to outpatient healthcare professionals	Auerbach	NEUTRAL
	care professionals
	Diagnostic or Therapeutic Problems - Emergency department decided to admit a patient who may not	Auerbach	NEUTRAL
	have required an inpatient stay
	lack of satisfactory primary care	Bianco	PREVENTABLE
	Admission Not Medically Necessary	Burke	PREVENTABLE
	Readmission for social or psychological reason (Reasons probably within control of hospital services (may include compliance))	Clarke	PREVENTABLE
	Readmission for social or psychological reason (Reasons probably within control of hospital services (may include compliance))	Clarke	PREVENTABLE
	could potentially have been treated in the outpatient setting	Dawes	PREVENTABLE
	Readmission for social or psychological reason within control of hospital services	Haines-Wood	PREVENTABLE
	Social readmission	Halfon	PREVENTABLE
	Inappropriate readmission (sub incorrect assessment or path of least resistance)	Jonas	PREVENTABLE
	Legitimate non-clinical readmission (lack of alternative resources; psychosocial or economic factors; care specific factors)	Jonas	UNPREVENTABLE
	Legitimate non-clinical readmission (lack of alternative resources; psychosocial or economic factors; care specific factors)	Jonas	UNPREVENTABLE
	Readmission for social or psychological reason. Reason probably within control of hospital services (may include compliance).	Maurer	PREVENTABLE
	Admissions for tests, procedures, or treatments that could have been accomplished in the outpatient setting but for which calendars or schedules did not allow (eg, blood transfusion)	Meisenberg	PREVENTABLE
	Symptoms of advanced burden of illness among patients with indications for—but not in—a hospice program	Meisenberg	PREVENTABLE
	Outpatient diagnostic procedures had been available (e.g., colonoscopy)	Oddone	PREVENTABLE
	Outpatient therapeutic procedures had been available (e.g., radiotherapy)	Oddone	PREVENTABLE
	Outpatient surgery had been available	Oddone	PREVENTABLE
	The patient lived closer and could have been treated as an outpatient	Oddone	PREVENTABLE
	The patient lived closer and could have been treated as an outpatient	Oddone	PREVENTABLE
	Increased resources could have prevented return	Pace	PREVENTABLE
	Miscellaneous PR - COULD HAVE BEEN TREATED AS OUTPATIENT	Phelan	PREVENTABLE
	Social: lack of financial resources or housing, inadequate home	Shimizu	BOTH
	support, chaotic living situation
	Social: lack of financial resources or housing, inadequate home	Shimizu	BOTH
	support, chaotic living situation
	Social: lack of financial resources or housing, inadequate home	Shimizu	BOTH
	support, chaotic living situation
	system issues	Stein	NEUTRAL
	system errror	Van Walraven	PREVENTABLE
	living alone	Williams	NEUTRAL
	system - A need to transfer to Convalescence	Yam	PREVENTABLE
	social - covering carer system, lack of support and community services	Yam	PREVENTABLE
	system- inadequate palliative care/terminal care	Yam	PREVENTABLE
Organization – hospital department level (n=235; 61.7%)	fluid related - acute renal failure	Agrawal	PREVENTABLE
	fluid related - miscommunication at time of discharge	Agrawal	PREVENTABLE
	Diagnostic or Therapeutic Problems - Missed diagnosis during the index admission	Auerbach	NEUTRAL
	advance care planning - Patient with end-stage illness and goals of care discussion not	Auerbach	NEUTRAL
	documented
	Diagnostic or Therapeutic Problems - Inadequate treatment of pain during the index admission	Auerbach	NEUTRAL
	Medication Safety - Inadequate monitoring for adverse effects or nonadherence	Auerbach	NEUTRAL
	patient need for additional or different home services than those services included in discharge plans	Auerbach	PREVENTABLE
	discharge of patients too soon from index admission	Auerbach	PREVENTABLE
	educating patients and promoting selfmanagement - Patient lacked awareness of whom to contact after discharge or	Auerbach	NEUTRAL
	when to go (or not to go) to the emergency department
	inadequate treatment of symptoms other than pain	Auerbach	PREVENTABLE
	inadequate monitoring for medication adverse effects or nonadherence	Auerbach	PREVENTABLE
	follow-up appointments not scheduled sufficiently soon after discharge	Auerbach	PREVENTABLE
	issues related to the decision to admit the patient made in the emergency department	Auerbach	PREVENTABLE
	Monitoring and Managing Symptoms After Discharge - Lack of disease monitoring (eg, following daily weights, etc)	Auerbach	NEUTRAL
	discharge planning - Inappropriate choice of discharge location (eg, skilled nursing	Auerbach	NEUTRAL
	facility vs home)
	discharge planning - Patient discharged too soon from the index hospitalization	Auerbach	NEUTRAL
	Inappropriately short hospital stay	Balla	PREVENTABLE
	Suboptimal drug treatmenty	Balla	PREVENTABLE
	Deficient workup during the index admission	Balla	PREVENTABLE
	Diagnostic error	Balla	PREVENTABLE
	Iatrogenic harm	Balla	PREVENTABLE
	Disregarding a significant laboratory result	Balla	PREVENTABLE
	lack of diagnosis in the first hospitalization	Bianco	PREVENTABLE
	procedures not performed in the first hospitalization	Bianco	PREVENTABLE
	unstable clinical condition at discharge from the first hospitalization	Bianco	PREVENTABLE
	Deficiency in the Discharge Process - premature discharge	Burke	PREVENTABLE
	Deficiency in the Discharge Process - overdosing prescribed medication	Burke	PREVENTABLE
	Deficiency in the Discharge Process - undergoing of a prescribed medication	Burke	PREVENTABLE
	Deficiency in the Discharge Process - adverse medication effect	Burke	PREVENTABLE
	Deficiency in the discharge Process - follow-up arrangements inadequate	Burke	PREVENTABLE
	Deficiency in the discharge process - inadeate communication of plan to recevie facility	Burke	PREVENTABLE
	Deficiency in the discharge process - discharge settin not appropriate	Burke	PREVENTABLE
	Deficiency in the Discharge Process - Inadequate functional status	Burke	PREVENTABLE
	Deficiency in the Discharge Process - patient unable to fill prescriptions	Burke	PREVENTABLE
	medication reconciliation documentation at discharge was correctly	Cakir	PREVENTABLE
	a vital test which could have changed the treatment was ordered as an outpatient follow up discharge	Cakir	PREVENTABLE
	the patient was instructed to see PCP or treating specialist for followup	Cakir	PREVENTABLE
	Recognised avoidable complication	Clarke	PREVENTABLE
	better follow-up care between discharge and readmission	Dawes	PREVENTABLE
	premature discharge during the index admission	Dawes	PREVENTABLE
	Care during index stay - Patient unstable at discharge or discharged too soon	Feigenbaum	PREVENTABLE
	Care during index stay - Surgical/procedural complication	Feigenbaum	PREVENTABLE
	Care during index stay - Medication error	Feigenbaum	PREVENTABLE
	Care during index stay - Missed or inaccurate diagnosis	Feigenbaum	PREVENTABLE
	Care during index stay - Inattention to advance care planning during index stay	Feigenbaum	PREVENTABLE
	Care during index stay - Suboptimal management of chronic condition	Feigenbaum	PREVENTABLE
	Care during index stay - Missed referrals for advance care planning	Feigenbaum	PREVENTABLE
	Care during index stay - Suboptimal coordination of care	Feigenbaum	PREVENTABLE
	Care during index stay - Unrecognized worsening condition	Feigenbaum	PREVENTABLE
	Discharge process - Delayed/inaccurate information from hospital to outpatient providers	Feigenbaum	PREVENTABLE
	Discharge process - Transition care plan absent or inadequate	Feigenbaum	PREVENTABLE
	Discharge process - Unaddressed psychological and social needs	Feigenbaum	PREVENTABLE
	Discharge process - Inadequate assessment of postdischarge risk and tailoring of care	Feigenbaum	PREVENTABLE
	Discharge process - Missed referrals	Feigenbaum	PREVENTABLE
	Discharge process - Inadequate teaching about medication management	Feigenbaum	PREVENTABLE
	Discharge process - Inadequate arrangements for supplies	Feigenbaum	PREVENTABLE
	Discharge process - Inadequate assessment of patient or caregiver understanding or ability	Feigenbaum	PREVENTABLE
	Follow-up care - Poor coordination between inpatient and outpatient providers	Feigenbaum	PREVENTABLE
	Follow-up care - Surgical/procedural complication	Feigenbaum	PREVENTABLE
	Follow-up care - Medication error	Feigenbaum	PREVENTABLE
	Follow-up care - Missed or inaccurate diagnosis	Feigenbaum	PREVENTABLE
	Follow-up care - Suboptimal management of index stay condition	Feigenbaum	PREVENTABLE
	Follow-up care - Suboptimal monitoring of patient’s condition	Feigenbaum	PREVENTABLE
	Follow-up care - Suboptimal management of chronic condition	Feigenbaum	PREVENTABLE
	Follow-up care - Missed referrals for advance care planning or end-of-life care	Feigenbaum	PREVENTABLE
	Follow-up care - Inadequate patient instructions	Feigenbaum	PREVENTABLE
	Follow-up care - Missed referrals	Feigenbaum	PREVENTABLE
	Follow-up care - Plan of care not adjusted to meet patient needs	Feigenbaum	PREVENTABLE
	Follow-up care - Delayed physician follow-up in clinic or skilled nursing facility	Feigenbaum	PREVENTABLE
	Follow-up care - Lack of follow-up on pending laboratory or procedure results	Feigenbaum	PREVENTABLE
	Follow-up care - Lack of follow-up on referrals made after discharge	Feigenbaum	PREVENTABLE
	Follow-up care - Inadequate attention to psychological or social needs	Feigenbaum	PREVENTABLE
	Follow-up care- Unrecognized worsening condition	Feigenbaum	PREVENTABLE
	Outpatient follow-up	Frankl	PREVENTABLE
	Miscommunication that caused incorrect medication dosing	Frankl	PREVENTABLE
	Initiation of oral medication	Glass	PREVENTABLE
	Diagnostic evaluation without acute process identified (sometimes in the setting of a transfer from	Glass	PREVENTABLE
	a distant facility)
	Inadequate pain control	Glass	PREVENTABLE
	Visiting nurse concern prompting emergency department evaluation as a result of lack of available	Glass	PREVENTABLE
	urgent outpatient evaluation
	Patient or family concern prompting emergency department evaluation as a result of lack of available urgent outpatient evaluation	Glass	PREVENTABLE
	Initiation of antibiotic for infectious process	Glass	UNPREVENTABLE
	Initiation of insulin	Glass	UNPREVENTABLE
	Initiation of enteral or parenteral feeds	Glass	UNPREVENTABLE
	Intravenous hydration or resuscitation	Glass	UNPREVENTABLE
	Percutaneous drain placement	Glass	UNPREVENTABLE
	Feeding tube placement (endoscopic)	Glass	UNPREVENTABLE
	Reoperation	Glass	UNPREVENTABLE
	Complications related to neurological impairment & immobility	Greenberg	UNPREVENTABLE
	Premature discharge	Greenberg	PREVENTABLE
	Complication from a neurosurgical procedure	Greenberg	UNPREVENTABLE
	Potentially inadequate outpatient medical follow-up of SAH-related pathology	Greenberg	PREVENTABLE
	Potentially inadequate outpatient follow-up of comorbid medical disease	Greenberg	PREVENTABLE
	Problems w/ healthcare transitions	Greenberg	PREVENTABLE
	Recognized avoidable complication	Haines-Wood	PREVENTABLE
	Premature discharge	Halfon	PREVENTABLE
	Discharge with a missing or erroneous diagnosis or therapy	Halfon	PREVENTABLE
	Failure of postdischarge follow-up care	Halfon	PREVENTABLE
	Complication of surgical care	Halfon	PREVENTABLE
	Complication of nonsurgical care	Halfon	PREVENTABLE
	Drug-related adverse event	Halfon	PREVENTABLE
	Other inadequate discharge	Halfon	PREVENTABLE
	Communication had been better between inpatient and outpatient providers	Harhay	PREVENTABLE
	The patient had received prescribed medications	Harhay	PREVENTABLE
	An alternative medical regimen had been prescribed at discharge	Harhay	PREVENTABLE
	The patient had a clinical parameter or surgical issue appropriately addressed during their index hospitalization	Harhay	PREVENTABLE
	Outpatient diagnostic or therapeutic procedures had been available	Harhay	PREVENTABLE
	Complication of surgical procedure	Jiminez-Puente	PREVENTABLE
	lack of diagnosis during the index episode	Jiminez-Puente	PREVENTABLE
	Procedure not performed during the index episode	Jiminez-Puente	PREVENTABLE
	Surgical treatment that did not reach the proposed objective	Jiminez-Puente	PREVENTABLE
	Problem resulted from medication side effect (after watch period)	Jonas	UNPREVENTABLE
	Problematic condition on discharce (patient should not have been discharged)	Jonas	PREVENTABLE
	Problem resulted from inadequate post discharge care planning	Jonas	PREVENTABLE
	Problem result from nosocomial or iatrogenic factors (sub: nosocomial infection; surgical misadventure or medication error)	Jonas	PREVENTABLE
	Problem result from nosocomial or iatrogenic factors (sub: nosocomial infection; surgical misadventure or medication error)	Jonas	PREVENTABLE
	Problem result from nosocomial or iatrogenic factors (sub: nosocomial infection; surgical misadventure or medication error)	Jonas	PREVENTABLE
	Detection (of problem) was not appropriately facilitated	Jonas	PREVENTABLE
	Failed to take appropriate steps to minimize likelihood of complication	Jonas	PREVENTABLE
	Effort by hospital/discharging physician to ensure correct post-discharge care by family was inadequate	Jonas	PREVENTABLE
	Effort by hospital/discharging physician to ensure correct post-discharge care by community services was inadequate	Jonas	PREVENTABLE
	An acute medical complication plausibly related to care during the initial admission	Kelly	PREVENTABLE
	A surgical procedure to address a continuation or a recurrence of the problem causing the initial admission	Kelly	PREVENTABLE
	A surgical procedure to address a complication resulting from care during the initial admission	Kelly	PREVENTABLE
	An acute decompensation of a chronic problem that was not the reason for the initial admission, but was plausibly related to care either during or immediately after the initial admission	Kelly	PREVENTABLE
	Recognised avoidable complication.	Maurer	PREVENTABLE
	Admissions for febrile neutropenia that did not meet criteria for outpatient management	Meisenberg	UNPREVENTABLE
	Symptoms related to aggressive care among patients with advanced or refractory disease	Meisenberg	PREVENTABLE
	Admissions for escalating symptom crises that reasonably could have been anticipated and avoided with better communication between patient and clinical staff	Meisenberg	PREVENTABLE
	Symptoms related to aggressive care without evidence of refractoriness	Meisenberg	UNPREVENTABLE
	Admissions for febrile neutropenia that met all criteria for safe outpatient management	Meisenberg	PREVENTABLE
	poor or inappropriate health care management	Miles	PREVENTABLE
	scheduled theatre was cancelled. It was not possible to determine from the notes the reason	Miles	UNPREVENTABLE
	for the cancellations.
	infection (urinary tract infection in 4 and pneumonia in	Mittal	PREVENTABLE
	deep venous thrombosis and pulmonary embolism	Mittal	PREVENTABLE
	contrast-induced nephropathy	Mittal	PREVENTABLE
	stroke due to missed opportunity for early carotid endarterectomy	Mittal	PREVENTABLE
	adverse drug reaction	Mittal	PREVENTABLE
	fall with or without fracture	Mittal	PREVENTABLE
	readmissions related to lack of clear discharge instructionswere defined as caseswhere a lack of communication between the discharging service and either the patient or the accepting service prompted the readmission;	Nahab	PREVENTABLE
	readmissions resulting from a delay in palliative care consultation were defined as cases where hospice-eligible patients at the time of discharge did not have any documented consultation or discussion with	Nahab	PREVENTABLE
	palliative care during the index hospitalization and were readmitted
	for hospice placement;
	readmissions related to lack of early outpatient follow-up were defined as cases in which an expedited outpatient follow-up could have addressed ongoing medical (eg, headache treatment) or surgical issues (eg, wound care) at the time of discharge;	Nahab	PREVENTABLE
	readmissions related to an incomplete evaluation were defined as cases where diagnostic testing, rehabilitation evaluation, or treatment of active symptoms during the index visit was not completed.	Nahab	PREVENTABLE
	complication	Nijhawan	PREVENTABLE
	plausibly related to the care during the first admission
	complication of a surgical procedure	Nijhawan	PREVENTABLE
	surgical procedure that was not done in the initial admission	Nijhawan	PREVENTABLE
	Nursing home care had been available	Oddone	PREVENTABLE
	Home health care had been available	Oddone	PREVENTABLE
	The patient had had a physician assessment (VA or non-VA) and/or change in therapy within 2 weeks prior to admission	Oddone	PREVENTABLE
	The patient had received prescribed medications (VA or non-VA)	Oddone	PREVENTABLE
	preventable because of an error on	Pace	PREVENTABLE
	discharge
	Recent alteration in medications or non-compliance with prescribed medication	Phelan	PREVENTABLE
	closer outpatient monitoring, longer initial	Ryan	PREVENTABLE
	hospital stay
	need for hospice discussion	Ryan	PREVENTABLE
	errors in discharge planning	Saunders	PREVENTABLE
	diagnosis and missed diagnosis	Saunders	PREVENTABLE
	inadequate treatment of infection present at index admission	Saunders	PREVENTABLE
	inadequate treatment of noninfectious	Saunders	PREVENTABLE
	Use of TPN (total parenteral nutrition)	Saunders	PREVENTABLE
	complications occurring in spite of best practices being followed	Shah	UNPREVENTABLE
	complications of the progression of the natural history of certain chronic neurosurgical diseases	Shah	UNPREVENTABLE
	shunt malfunctions	Shah	UNPREVENTABLE
	complications with wounds	Shah	PREVENTABLE
	nosocomial infections	Shah	PREVENTABLE
	postprocedure complications	Shah	PREVENTABLE
	complications from medications either started or withheld during the primary admission	Shah	PREVENTABLE
	refractory postoperative pain	Shah	PREVENTABLE
	fall at subacute care facilities	Shah	PREVENTABLE
	poor discharge planning	Shalchi	PREVENTABLE
	hospital-acquired infection	Shalchi	PREVENTABLE
	drug-related	Shalchi	PREVENTABLE
	incomplete investigation	Shalchi	PREVENTABLE
	Clinical: Medication errors, adverse drug reactions, complication of procedures, inappropriate discharge, lab or test error, missed diagnosis, inappropriate medical care	Shimizu	BOTH
	Clinical: Medication errors, adverse drug reactions, complication of procedures, inappropriate discharge, lab or test error, missed diagnosis, inappropriate medical care	Shimizu	BOTH
	Clinical: Medication errors, adverse drug reactions, complication of procedures, inappropriate discharge, lab or test error, missed diagnosis, inappropriate medical care	Shimizu	BOTH
	Systems-based: Medications not provided, follow-up appointments not made, inadequate teaching, lapse of communication between inpatient and outpatient, appropriate referrals not	Shimizu	BOTH
	made (e.g. hospice, home health), unavailable diagnostic or
	therapeutic modalities.
	New diagnosis, which could not have been predicted at time of	Shimizu	BOTH
	index discharge
	Clinical: Medication errors, adverse drug reactions, complication of procedures, inappropriate discharge, lab or test error, missed diagnosis, inappropriate medical care	Shimizu	BOTH
	Clinical: Medication errors, adverse drug reactions, complication of procedures, inappropriate discharge, lab or test error, missed diagnosis, inappropriate medical care	Shimizu	BOTH
	Systems-based: Medications not provided, follow-up appointments not made, inadequate teaching, lapse of communication between inpatient and outpatient, appropriate referrals not	Shimizu	BOTH
	made (e.g. hospice, home health), unavailable diagnostic or
	therapeutic modalities.
	Clinical: Medication errors, adverse drug reactions, complication of procedures, inappropriate discharge, lab or test error, missed diagnosis, inappropriate medical care	Shimizu	BOTH
	Systems-based: Medications not provided, follow-up appointments not made, inadequate teaching, lapse of communication between inpatient and outpatient, appropriate referrals not	Shimizu	BOTH
	made (e.g. hospice, home health), unavailable diagnostic or
	therapeutic modalities.
	Clinical: Medication errors, adverse drug reactions, complication of procedures, inappropriate discharge, lab or test error, missed diagnosis, inappropriate medical care	Shimizu	BOTH
	Systems-based: Medications not provided, follow-up appointments not made, inadequate teaching, lapse of communication between inpatient and outpatient, appropriate referrals not	Shimizu	BOTH
	made (e.g. hospice, home health), unavailable diagnostic or
	therapeutic modalities.
	Systems-based: Medications not provided, follow-up appointments not made, inadequate teaching, lapse of communication between inpatient and outpatient, appropriate referrals not	Shimizu	BOTH
	made (e.g. hospice, home health), unavailable diagnostic or
	therapeutic modalities.
	Systems-based: Medications not provided, follow-up appointments not made, inadequate teaching, lapse of communication between inpatient and outpatient, appropriate referrals not	Shimizu	BOTH
	made (e.g. hospice, home health), unavailable diagnostic or
	therapeutic modalities.
	Systems-based: Medications not provided, follow-up appointments not made, inadequate teaching, lapse of communication between inpatient and outpatient, appropriate referrals not	Shimizu	BOTH
	made (e.g. hospice, home health), unavailable diagnostic or
	therapeutic modalities.
	Medication problem	Stein	NEUTRAL
	Inadequate treatment or incomplete diagnostic process	Stein	NEUTRAL
	Inadequate treatment or incomplete diagnostic process	Stein	NEUTRAL
	follow-up	Stein	NEUTRAL
	poor communication with providers after discharge	Sutherland	BOTH
	premature index discharge	Sutherland	PREVENTABLE
	inadequate medical monitoring	Sutherland	PREVENTABLE
	physican related - Surgical site infections and wound dehiscences	Tejedor-Sojo	PREVENTABLE
	postoperative complication/hospital- acquired condition	Toomey	PREVENTABLE
	patient/caregiver educatioin	Toomey	PREVENTABLE
	handover communication after discharge from hospital	Toomey	PREVENTABLE
	complications - wound	Vachon	PREVENTABLE
	complications - abdominal	Vachon	PREVENTABLE
	complications - pulmonary	Vachon	PREVENTABLE
	complciations - Thromboembolic	Vachon	PREVENTABLE
	complications - central nervous system	Vachon	PREVENTABLE
	complications - hematoma	Vachon	PREVENTABLE
	complications - other	Vachon	PREVENTABLE
	surgical complications	Van Walraven	PREVENTABLE
	nosocomial infection	Van Walraven	PREVENTABLE
	medication related events	Van Walraven	PREVENTABLE
	diagnostic error	Van Walraven	PREVENTABLE
	procedure realted	Van Walraven	PREVENTABLE
	inadequate discharge planning	Vinson	PREVENTABLE
	inadequate follow u0p	Vinson	PREVENTABLE
	physician related - premature discharge	Wallace	PREVENTABLE
	physician related - incompete discarge instructions	Wallace	PREVENTABLE
	Bleeding complications	Wasfy	PREVENTABLE
	Stent thrombosis	Wasfy	PREVENTABLE
	Suboptimal medication management	Wasfy	PREVENTABLE
	Non-compliance that could have been prevented by care givers	Wasfy	PREVENTABLE
	Inability to obtain an outpatient appointment	Wasfy	PREVENTABLE
	disclocated hip	Weinberg	PREVENTABLE
	Urinary tract infection	Weinberg	PREVENTABLE
	Diverticular disease	Weinberg	PREVENTABLE
	lack of information from hospital to GP	Williams	NEUTRAL
	Complication of initial illness	Williams	NEUTRAL
	problems with medication	Williams	NEUTRAL
	probems with medication	Williams	NEUTRAL
	discharge too soon	Williams	NEUTRAL
	terminal care	Williams	NEUTRAL
	GP failure to visit	Williams	NEUTRAL
	inadequate preparation for discharge	Williams	NEUTRAL
	clinician - premature discharge	Yam	PREVENTABLE
	system - inadequate discharge planning	Yam	PREVENTABLE
	system - lack of discharge post follow up care	Yam	PREVENTABLE
	clinician - drug related adverse event	Yam	PREVENTABLE
	system - lack of care coordination	Yam	PREVENTABLE
Human – care provider (n=15; 3.9%)	Failure resulting from faulty task planning or performance.	Cooksley	PREVENTABLE
	Failure of an individual to apply their knowledge to a new clinical situation.	Cooksley	PREVENTABLE
	An inappropriately trained individual performing the clinical task	Cooksley	PREVENTABLE
	Human failures beyond the control of the organisation/department.	Cooksley	PREVENTABLE
	physicians' failure to be informed or otherwise note abnormal physical signs or symptoms that were detected by nurses or other medical personnel.	Frankl	PREVENTABLE
	Wishful thinking (physician / patient)	Frankl	PREVENTABLE
	Suboptimal judgements of physicians	Frankl	PREVENTABLE
	Inappropriate readmission (sub incorrect assessment or path of least resistance)	Jonas	PREVENTABLE
	Admitting physician's threshold for admission was appropriately higher	Oddone	PREVENTABLE
	physician related - poor distal drainage and malfunction	Tejedor-Sojo	PREVENTABLE
	physican related - medication prescription error	Tejedor-Sojo	PREVENTABLE
	phycisican related - incorrect diagnosis or therapy	Wallace	PREVENTABLE
	clinician - low treshold for readmission	Yam	PREVENTABLE
	clinician - Discharge with a missing/erroneous diagnosis/therapy	Yam	PREVENTABLE
	clinician - suboptimal medical care	Yam	PREVENTABLE
Human – informal caregiver (n=9; 2.4%)	The patient had adequate support at home	Harhay	PREVENTABLE
	caregiver related - patients manipulating their wound despite documented instructions to maintain it clean and dry	Tejedor-Sojo	PREVENTABLE
	caregiver related - families cancelling or not scheduling follow-up appointments	Tejedor-Sojo	PREVENTABLE
	contributing social factors or parental anxiety	Toomey	PREVENTABLE
	inadequate social support	Vinson	PREVENTABLE
	caretaker related - Parental perception of incomplete evaluation during previous hospital stay	Wallace	PREVENTABLE
	caretaker related - Noncompliance with discharge medications	Wallace	PREVENTABLE
	caregtaker related - Parental perception of early discharge	Wallace	PREVENTABLE
	carer problems	Williams	NEUTRAL
Patient – self-management (n=42; 11.0%)	fluid related - inability to keep a scheduled clincial visit	Agrawal	PREVENTABLE
	fluid related - nomcompliance diet and medication	Agrawal	PREVENTABLE
	Hepatic encephalopathy - noncompliance to medication	Agrawal	PREVENTABLE
	advance care planning - Patient nearing end of life but still wants hospitalization and full	Auerbach	NEUTRAL
	treatment measures
	Monitoring and Managing Symptoms After Discharge - Patient was not able to keep postdischarge appointments	Auerbach	NEUTRAL
	patient lack of awareness of whom to contact after discharge or when to go (or not to go) to the ED	Auerbach	PREVENTABLE
	Patient behavior - adherence to discharge plan	Burke	UNPREVENTABLE
	patient behavior - refusal of discharge plan	Burke	UNPREVENTABLE
	Patient behavior - substance use	Burke	UNPREVENTABLE
	Initial discharge against medical advice	Burke	PREVENTABLE
	Readmission for social or psychological reason (Reasons probably beyond control of hospital services (may include compliance))	Clarke	UNPREVENTABLE
	Follow-up care -Patient did not know how or when to contact provider	Feigenbaum	PREVENTABLE
	Wishful thinking (physician / patient)	Frankl	PREVENTABLE
	Readmission for social or psychological reason beyond control of hospital services	Haines-Wood	UNPREVENTABLE
	Inadequate patient behavior	Halfon	PREVENTABLE
	The patient had been compliant with their medication regimen	Harhay	PREVENTABLE
	The patient had understood their discharge instructions	Harhay	PREVENTABLE
	Readmission for social or psychological reason. Reason probably beyond control of hospital services (may include compliance).	Maurer	UNPREVENTABLE
	Unavoidable complication.	Maurer	UNPREVENTABLE
	malignancies, trauma, obstetrical causes, or after leaving	Nijhawan	UNPREVENTABLE
	‘‘against medical advice’’
	The patient had been compliant with medication regimen	Oddone	PREVENTABLE
	Patient had abstained from alcohol/drugs in the previous month	Oddone	PREVENTABLE
	or because of patient noncompliance	Pace	PREVENTABLE
	Recent alteration in medications or non-compliance with prescribed medication	Phelan	PREVENTABLE
	improved medication compliance	Ryan	PREVENTABLE
	education about salt restriction	Ryan	PREVENTABLE
	Patient-specific: medication/appointment/other cares nonadherence,	Shimizu	BOTH
	patient choice, alcohol or drug abuse, psychiatric disorder
	Patient-specific: medication/appointment/other cares nonadherence,	Shimizu	BOTH
	patient choice, alcohol or drug abuse, psychiatric disorder
	Patient-specific: medication/appointment/other cares nonadherence,	Shimizu	BOTH
	patient choice, alcohol or drug abuse, psychiatric disorder
	Patient-specific: medication/appointment/other cares nonadherence,	Shimizu	BOTH
	patient choice, alcohol or drug abuse, psychiatric disorder
	Patient-specific: medication/appointment/other cares nonadherence,	Shimizu	BOTH
	patient choice, alcohol or drug abuse, psychiatric disorder
	substance abuse N/A	Stein	NEUTRAL
	Nonadherence N/A	Stein	NEUTRAL
	mental health	Stein	NEUTRAL
	difficulty with surgeon follow-up	Sutherland	PREVENTABLE
	a lack of understanding how to care for themselves postdischarge	Sutherland	PREVENTABLE
	difficulty understanding the discharge plan	Sutherland	PREVENTABLE
	medication non-compliance	Vinson	PREVENTABLE
	dietary non-adherence	Vinson	PREVENTABLE
	failure to seek medical help	Vinson	PREVENTABLE
	discharged self	Williams	NEUTRAL
	patient - compliance problems	Yam	PREVENTABLE
	social - patient coping	Yam	PREVENTABLE
Patient – disease (n=34; 8.9%)	Unpredictable Complication of Primary or Alternate Diagnosis	Burke	UNPREVENTABLE
	Unavoidable complication	Clarke	UNPREVENTABLE
	Recurrence or continuation of disorder leading to first admission	Clarke	PREVENTABLE
	Chronic or relapsing disorder; care at home desirable	Clarke	UNPREVENTABLE
	if possible.
	Delayed development of SAH-related pathology	Greenberg	UNPREVENTABLE
	Recurrence or continuation of disorder leading to first admissions	Haines-Wood	PREVENTABLE
	Chronic or relapsing disorder	Haines-Wood	UNPREVENTABLE
	Relapse or aggravation of a previously known affection	Halfon	PREVENTABLE
	Unavoidable recurrence or progression of disease	Jiminez-Puente	UNPREVENTABLE
	normal progress of pregnancy	Jiminez-Puente	UNPREVENTABLE
	problem was unpredictable	Jonas	UNPREVENTABLE
	Continuation or recurrence of the reason for the initial admission, or for a closely related condition	Kelly	PREVENTABLE
	Recurrence or continuation of disorder leading to first admission.	Maurer	PREVENTABLE
	Chronic or relapsing disorder; care at home desirable if possible.	Maurer	UNPREVENTABLE
	Symptoms of advanced burden of illness despite being in hospice program	Meisenberg	UNPREVENTABLE
	Admissions for symptom crises that developed despite communication and palliative maneuvers in the outpatient setting	Meisenberg	UNPREVENTABLE
	the condition of the patients	Miles	UNPREVENTABLE
	recurrence or continuation of the reason for the initial admission	Nijhawan	PREVENTABLE
	malignancies, trauma, obstetrical causes, or after leaving	Nijhawan	UNPREVENTABLE
	‘‘against medical advice’’
	Acute myocardial ischaemia	Phelan	UNPREVENTABLE
	Poorly controlled arrhythmias	Phelan	UNPREVENTABLE
	No identified factor Urs	Phelan	UNPREVENTABLE
	Disease progression	Shimizu	BOTH
	Patient-specific: medication/appointment/other cares nonadherence,	Shimizu	BOTH
	patient choice, alcohol or drug abuse, psychiatric disorder
	Medical problem	Stein	NEUTRAL
	disease related - Unforeseen worsening of disease process	Wallace	PREVENTABLE
	disease related - Unforeseen development of a complication of the disease process or treatment	Wallace	PREVENTABLE
	disease related - Recurrence of disease with evidence of improvement after first admission	Wallace	PREVENTABLE
	chest pain not otherwise specified	Weinberg	PREVENTABLE
	relapse of intitial illness	Williams	NEUTRAL
	incontinence	Williams	NEUTRAL
	patient - relapse of previous complaint	Yam	PREVENTABLE
	patient - progress of previous complaint	Yam	PREVENTABLE
	patient - Recurrence of previous pathology	Yam	PREVENTABLE
Unclassifiable (n=15; 3.9%)	Chronic or relapsing disorder; care at home desirable	Clarke	UNPREVENTABLE
	if possible.
	Care during index stay - Missed referrals	Feigenbaum	PREVENTABLE
	Inadequate support at home (self-care, meals, nutrition)	Glass	PREVENTABLE
	Transfer from outside facility with re-interpretation of imaging results	Glass	PREVENTABLE
	The patient lived closer and could have been treated as an outpatient	Harhay	PREVENTABLE
	The patient had adequate support at home	Oddone	PREVENTABLE
	Miscellaneous UR	Phelan	UNPREVENTABLE
	improved medication	Ryan	PREVENTABLE
	reconciliation
	difficulty managing medications	Sutherland	PREVENTABLE
	Patient assessment	Toomey	PREVENTABLE
	management error	Van Walraven	PREVENTABLE
	Staged PCI without new symptoms	Wasfy	PREVENTABLE
	Disease progression	Wasfy	PREVENTABLE
	poor health on discharge	Williams	NEUTRAL
	problems with services	Williams	NEUTRAL
